# Supplementary material for: Meghalayan environmental evolution of the Thapsus coast (Tunisia) as inferred from sedimentological and micropaleontological proxies
Source: Copernicus journal article supplement (doi:10.5194/jm-41-129-2022), 2022-09-13
Supplement: Supplementary file 1 [file jm-41-129-2022-supplement.zip]

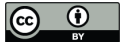

## *Supplement of*

# **Meghalayan environmental evolution of the Thapsus coast (Tunisia) as inferred from sedimentological and micropaleontological proxies**

**Mohamed Kamoun et al.**

*Correspondence to:* Mohamed Kamoun (med23km@yahoo.fr)

- jm-41-129-2022-supplement-title-page.pdf
- supplement 1 (data foraminifera , RD1 core).xlsx
- supplement 2 ( data foraminifera, RD3 core).xlsx
- supplement 3 (data foraminifera, RD8 core).xlsx
- supplement 4 Grain Size analysis (RD1, RD3 and RD8 cores).xlsx

The copyright of individual parts of the supplement might differ from the article licence.
